# Supplementary material for: Mutators can drive the evolution of multi-resistance to antibiotics
Source: PubMed Central journal article supplement (PMC10292718; doi:10.1371/journal.pgen.1010791), 2023-06-13

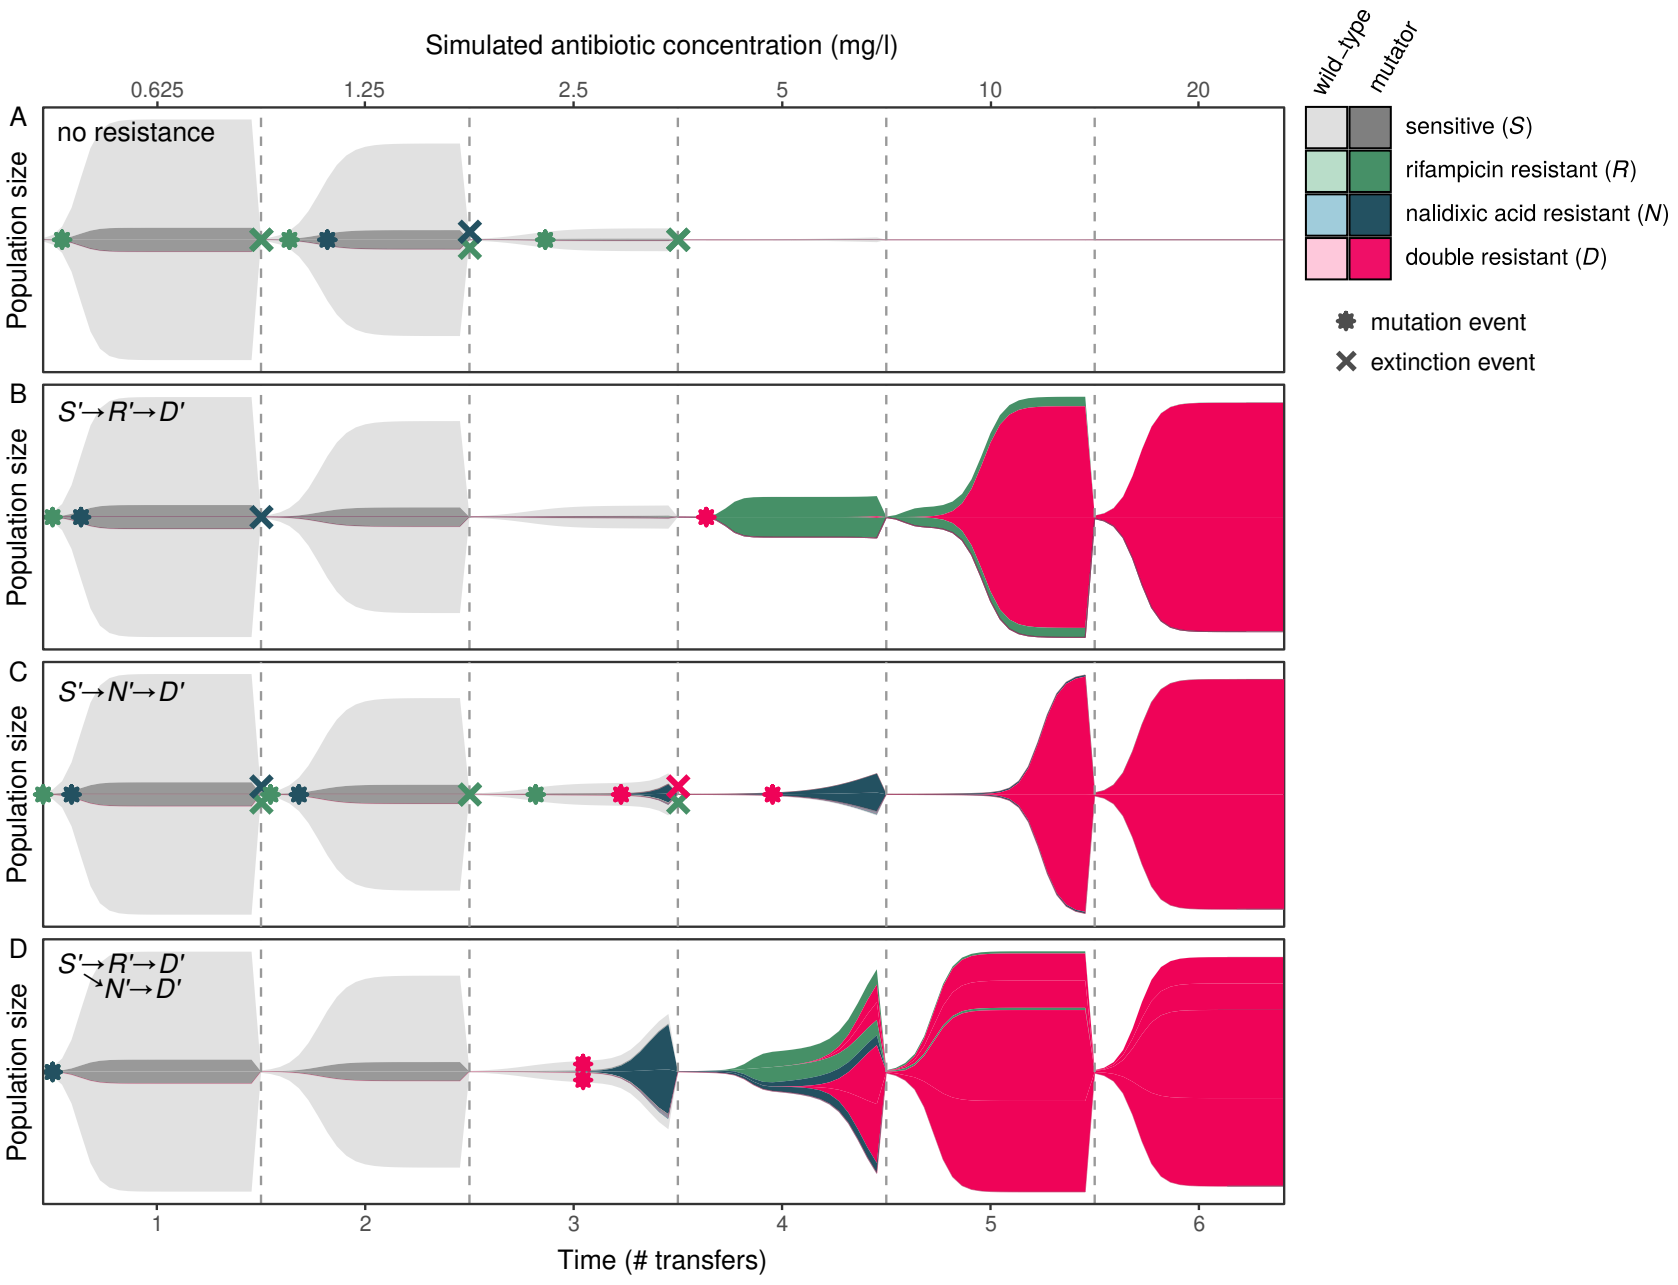

Supplement: pgen.1010791.s007.pdf [file pgen.1010791.s007.pdf]
